# Supplementary material for: The effect of the present-day imbalance on schematic and climate forced simulations of the West Antarctic Ice Sheet collapse
Source: Copernicus journal article supplement (doi:10.5194/egusphere-2025-3380), 2025-08-26
Supplement: Supplementary file 1 [file egusphere-2025-3380-supplement.pdf]

# Supplementary Material for:

## The effect of the present-day imbalance on schematic and climate forced simulations of the West Antarctic Ice Sheet collapse

Tim van den Akker<sup>1</sup>, William H. Lipscomb<sup>2</sup>, Gunter R. Leguy<sup>2</sup>, Willem Jan van de Berg<sup>1</sup>, Roderik S.W. van de Wal<sup>1,3,4</sup>

<sup>1</sup>Institute for Marine and Atmospheric Research Utrecht, Utrecht University, Netherlands

<sup>2</sup>Climate and Global Dynamics Laboratory, NSF National Center for Atmospheric Research, Boulder, CO, USA

<sup>3</sup>Department of Physical Geography, Utrecht University, Netherlands

<sup>4</sup>KNMI Royal Netherlands Meteorological Institute, De Bilt, Netherlands

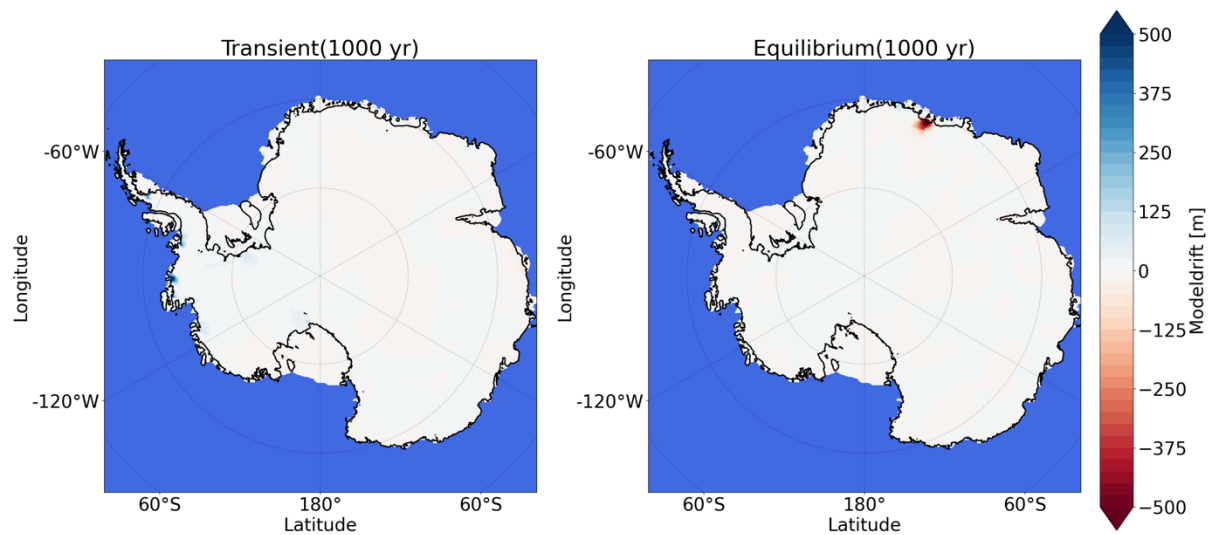

**Figure S1. Ice thickness changes due to modeldrift** after 1000 years of unforced simulations. The transient initialization is shown on the left, the equilibrium initialization on the right.

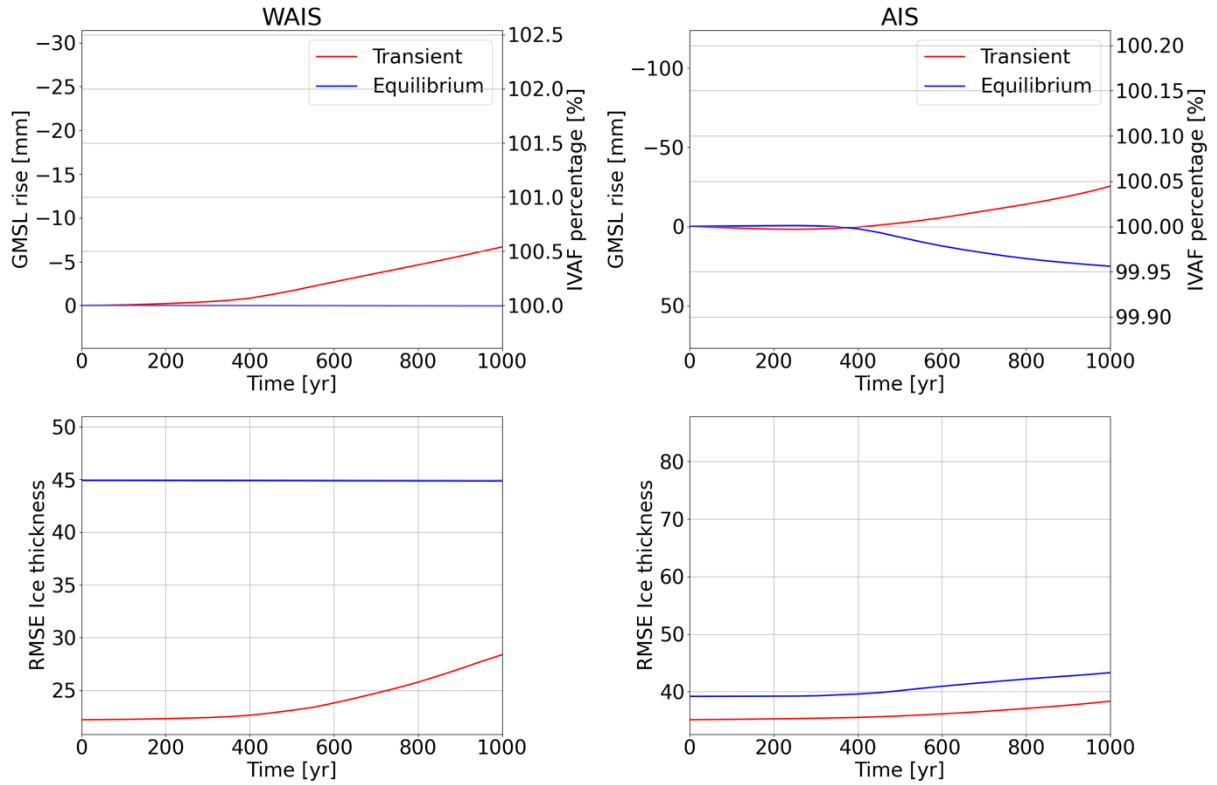

**Figure S2. Model drift expressed as function of (upper panels) integrated GMSL rise and change in IVAF percentage and (lower panels) RMSE of modelled ice thickness wrt observations for both initializations after 1000 years of unforced simulations. The transient initializations is shown in red, the equilibrium initialization in blue.**

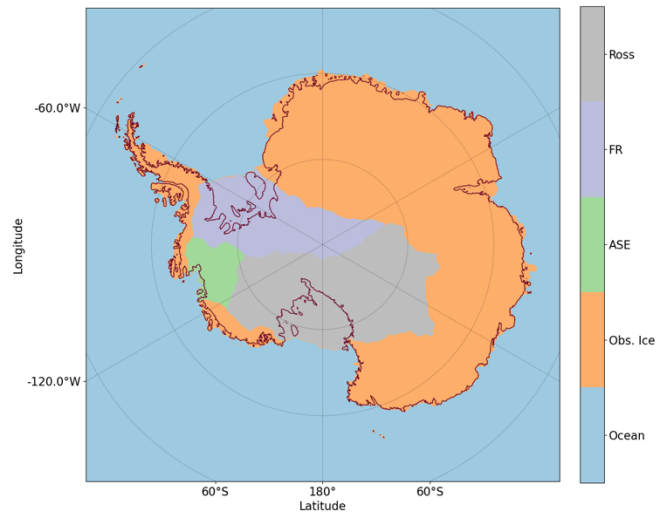

**Figure S3. Regions considered in detail in this study, following the basins of Zwally et al. (2015). Observed grounding line is shown in red, the ASE basins in green, the Filchner-Ronne basins in purple and the Ross basins in grey. Grid cells with ice thickness observations are shown in orange.**

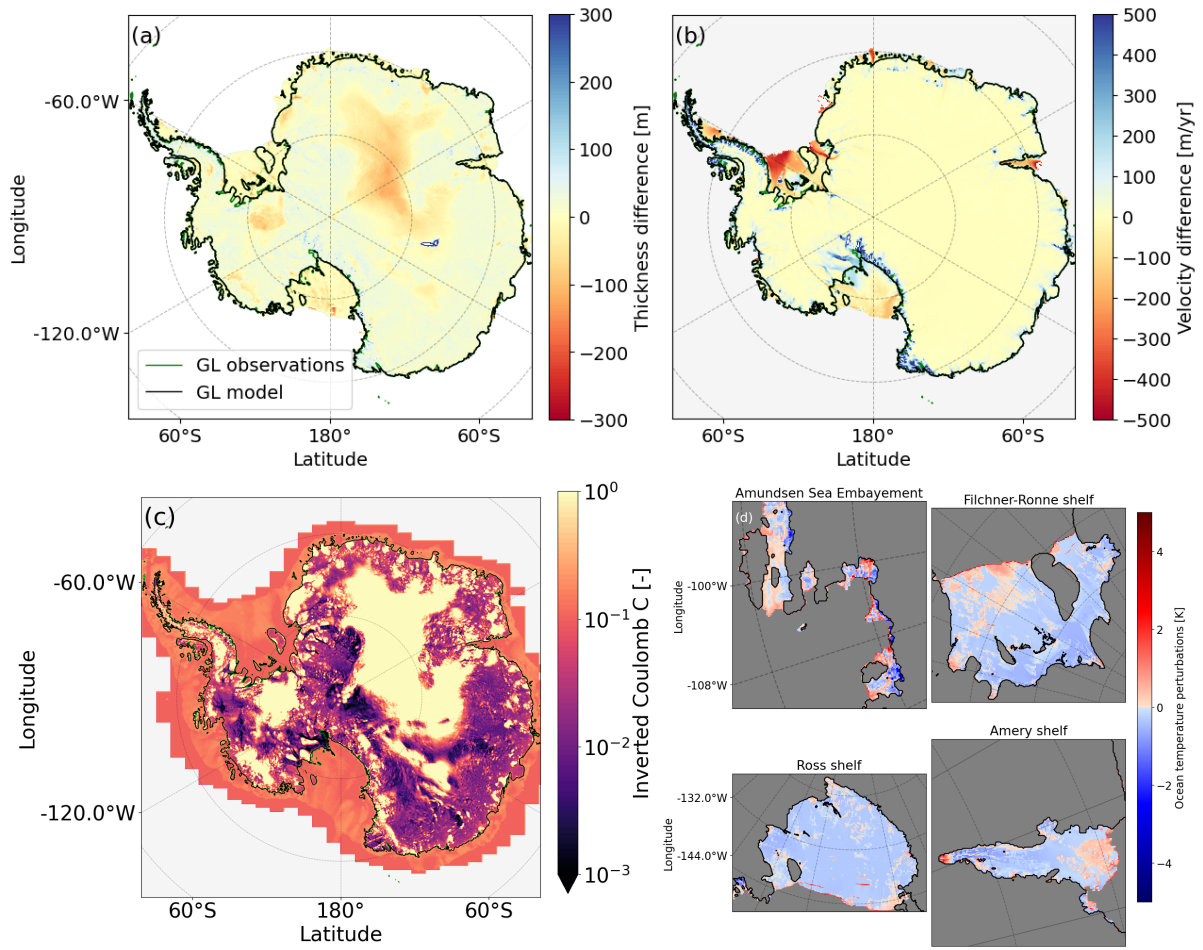

**Figure S4. Modelled Antarctic Ice Sheet initialized state with the transient initialization.** (a) thickness difference with respect to observations (Morlighem et al., 2020). The modelled grounding line is shown in black, and the observed grounding line in green (only visible where it does not overlap with the modelled one). (b) ice surface velocity difference with respect to the observations (Rignot et al., 2011). Positive values indicate regions where CISM overestimates the ice velocities. (c) the inverted  $C_c$  and (d) the inverted ocean temperature perturbation under the main shelves.

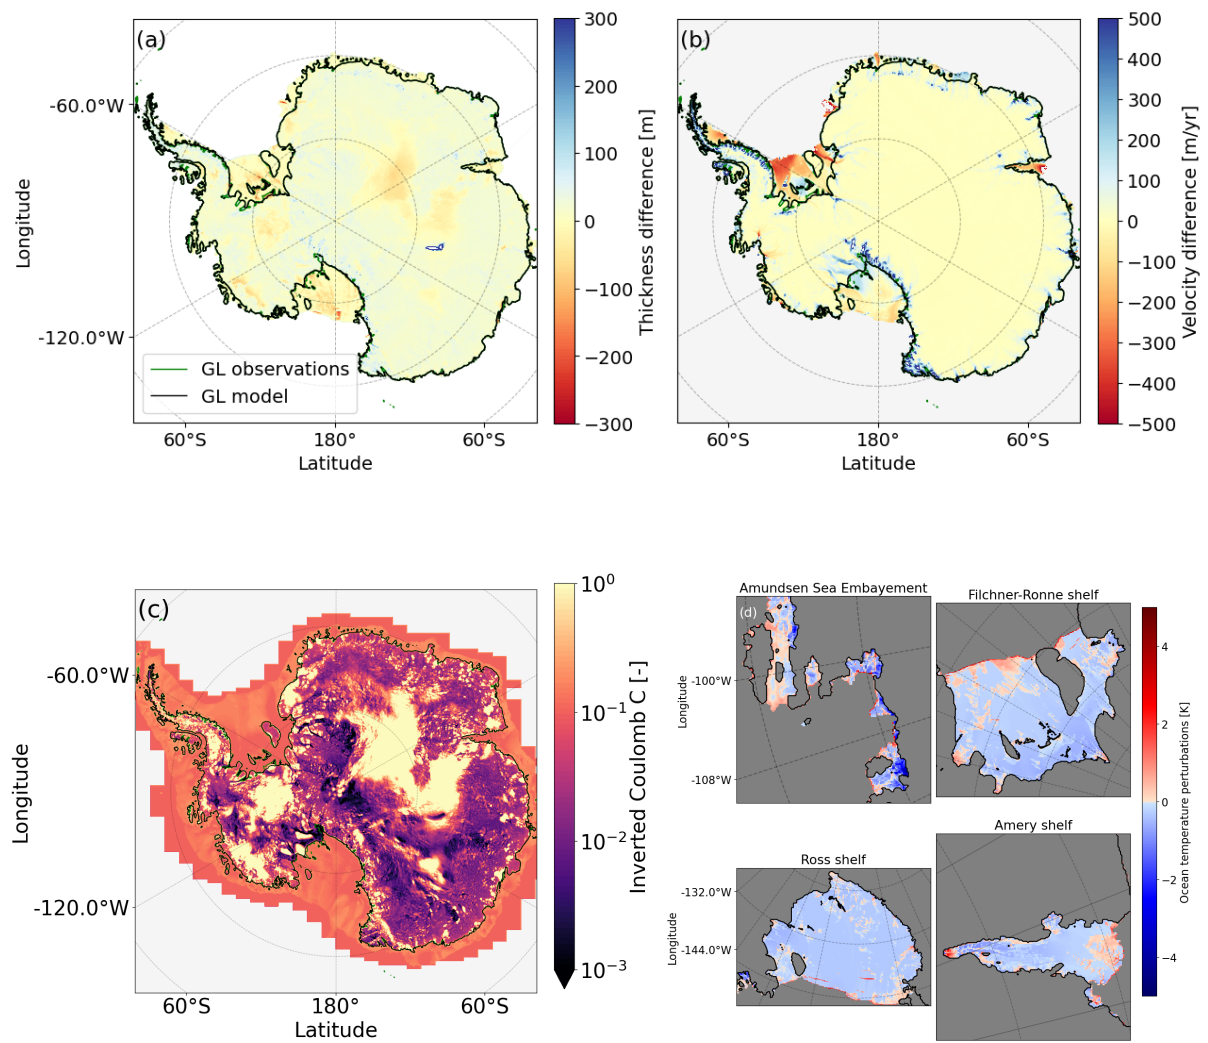

**Figure S5.** As in Figure S1 but for the equilibrium initialization

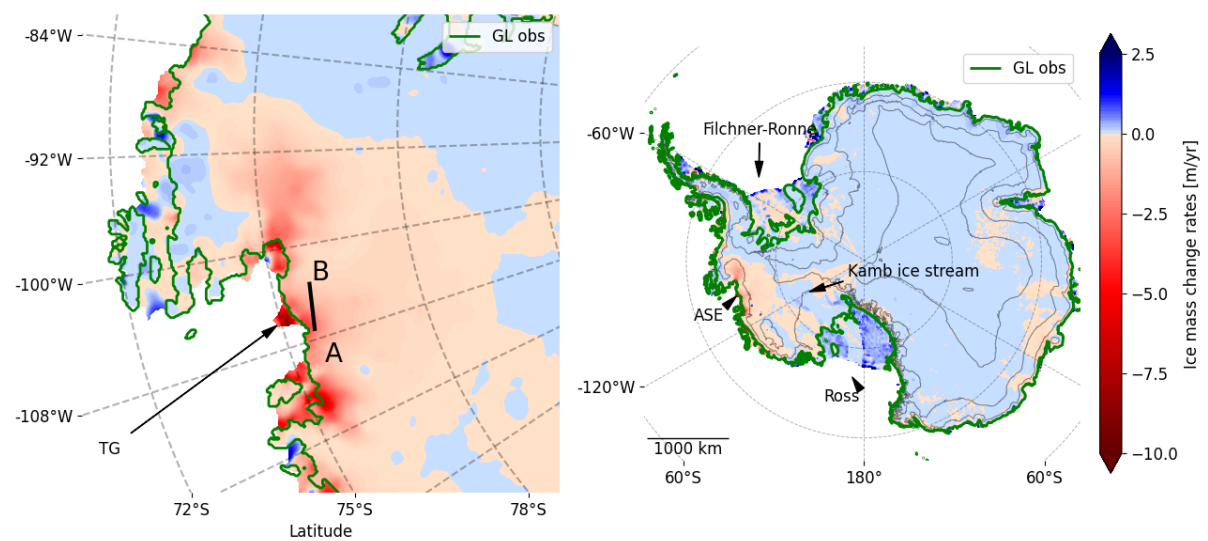

**Figure S6.** Mass change rates from Smith et al. (2020) interpolated to the CISM domain.

**Table S1. Variables used in this study.**

| Variables   | Units                 | Definition                                     |
|-------------|-----------------------|------------------------------------------------|
| $b$         | m                     | Bedrock height above sea level                 |
| $b_{mlt}$   | m yr <sup>-1</sup>    | Basal melt rates under floating ice            |
| $C_c$       | -                     | Coulomb C                                      |
| $C_r$       | -                     | Basal friction relaxation target               |
| $H$         | m                     | Modelled ice thickness                         |
| $H_{obs}$   | m                     | Observed ice thickness                         |
| $N$         | Pa                    | Effective pressure                             |
| $TF_{base}$ | K                     | Thermal forcing applied at the ice shelf draft |
| $u$         | m yr <sup>-1</sup>    | Ice velocity in the x-direction                |
| $v$         | m yr <sup>-1</sup>    | Ice velocity in the y-direction                |
| $u_b$       | m yr <sup>-1</sup>    | Basal velocities magnitude                     |
| $u_{x,b}$   | m yr <sup>-1</sup>    | Basal velocity in the x-direction              |
| $u_{y,b}$   | m yr <sup>-1</sup>    | Basal velocity in the y-direction              |
| $\delta T$  | K                     | Ocean temperature correction                   |
| $s$         | m                     | Surface elevation                              |
| $\beta$     | Pa yr m <sup>-1</sup> | Basal traction parameter                       |
| $\eta$      | Pa yr                 | Effective viscosity                            |
| $\tau_h$    | Pa                    | Basal shear stress                             |

**Table S2. Parameters and their units and values used in this study.**

| Parameters | Values                 | Units                              | Definition                                           |
|------------|------------------------|------------------------------------|------------------------------------------------------|
| $c_{pw}$   | 3974                   | J kg <sup>-1</sup> K <sup>-1</sup> | Specific heat of seawater                            |
| $g$        | 9.81                   | m s <sup>-2</sup>                  | Gravitational acceleration                           |
| $H_0$      | 100                    | m                                  | Ice thickness inversion scale factor                 |
| $L_f$      | 3.34 * 10 <sup>5</sup> | J kg <sup>-1</sup>                 | Latent heat of fusion                                |
| $m$        | 3                      | -                                  | Basal friction exponent                              |
| $T_r$      | 0                      | K                                  | Relaxation target of the ocean temperature inversion |
| $u_0$      | 200                    | m yr <sup>-1</sup>                 | Yield velocity                                       |
| $r$        | 0.5                    | -                                  | Strength of inversion regularization                 |
| $\rho_i$   | 917                    | kg m <sup>-3</sup>                 | Density of ice                                       |
| $\rho_w$   | 1027                   | kg m <sup>-3</sup>                 | Density of ocean water                               |
| $\tau$     | 100                    | yr                                 | Time scale in the inversion                          |
| $\gamma_0$ | 30000                  | m yr <sup>-1</sup>                 | Basal melt rate coefficient                          |
| $L$        | 4000                   | m                                  | Length scale of the Gaussian term                    |

## References

- Morlighem, M., Rignot, E., Binder, T., Blankenship, D., Drews, R., Eagles, G., Eisen, O., Ferraccioli, F., Forsberg, R., and Fretwell, P.: Deep glacial troughs and stabilizing ridges unveiled beneath the margins of the Antarctic ice sheet, *Nature Geoscience*, 13, 132-137, 2020.
- Rignot, E., Mouginot, J., and Scheuchl, B.: Ice flow of the Antarctic ice sheet, *Science*, 333, 1427-1430, 2011.
- Smith, B., Fricker, H. A., Gardner, A. S., Medley, B., Nilsson, J., Paolo, F. S., Holschuh, N., Adusumilli, S., Brunt, K., and Csatho, B.: Pervasive ice sheet mass loss reflects competing ocean and atmosphere processes, *Science*, 368, 1239-1242, 2020.
- Zwally, H. J., Li, J., Robbins, J. W., Saba, J. L., Yi, D., and Brenner, A. C.: Mass gains of the Antarctic ice sheet exceed losses, *Journal of Glaciology*, 61, 1019-1036, 2015.
